# Supplementary material
Source: Research Square preprint supplement (doi:10.21203/rs.3.rs-8874878/v1)
Supplement: Supplementary file 1 [file a41df57bc2e0c796a6e5af13.pdf]

## Reporting Summary

Nature Portfolio wishes to improve the reproducibility of the work that we publish. This form provides structure for consistency and transparency in reporting. For further information on Nature Portfolio policies, see our [Editorial Policies](#) and the [Editorial Policy Checklist](#).

### Statistics

For all statistical analyses, confirm that the following items are present in the figure legend, table legend, main text, or Methods section.

- | n/a                                 | Confirmed                                                                                                                                                                                                                                                                                      |
|-------------------------------------|------------------------------------------------------------------------------------------------------------------------------------------------------------------------------------------------------------------------------------------------------------------------------------------------|
| <input type="checkbox"/>            | <input checked="" type="checkbox"/> The exact sample size ( $n$ ) for each experimental group/condition, given as a discrete number and unit of measurement                                                                                                                                    |
| <input type="checkbox"/>            | <input checked="" type="checkbox"/> A statement on whether measurements were taken from distinct samples or whether the same sample was measured repeatedly                                                                                                                                    |
| <input type="checkbox"/>            | <input checked="" type="checkbox"/> The statistical test(s) used AND whether they are one- or two-sided<br><i>Only common tests should be described solely by name; describe more complex techniques in the Methods section.</i>                                                               |
| <input type="checkbox"/>            | <input checked="" type="checkbox"/> A description of all covariates tested                                                                                                                                                                                                                     |
| <input type="checkbox"/>            | <input checked="" type="checkbox"/> A description of any assumptions or corrections, such as tests of normality and adjustment for multiple comparisons                                                                                                                                        |
| <input type="checkbox"/>            | <input checked="" type="checkbox"/> A full description of the statistical parameters including central tendency (e.g. means) or other basic estimates (e.g. regression coefficient) AND variation (e.g. standard deviation) or associated estimates of uncertainty (e.g. confidence intervals) |
| <input type="checkbox"/>            | <input checked="" type="checkbox"/> For null hypothesis testing, the test statistic (e.g. $F$ , $t$ , $r$ ) with confidence intervals, effect sizes, degrees of freedom and $P$ value noted<br><i>Give <math>P</math> values as exact values whenever suitable.</i>                            |
| <input checked="" type="checkbox"/> | <input type="checkbox"/> For Bayesian analysis, information on the choice of priors and Markov chain Monte Carlo settings                                                                                                                                                                      |
| <input checked="" type="checkbox"/> | <input type="checkbox"/> For hierarchical and complex designs, identification of the appropriate level for tests and full reporting of outcomes                                                                                                                                                |
| <input checked="" type="checkbox"/> | <input type="checkbox"/> Estimates of effect sizes (e.g. Cohen's $d$ , Pearson's $r$ ), indicating how they were calculated                                                                                                                                                                    |

*Our web collection on [statistics for biologists](#) contains articles on many of the points above.*

### Software and code

Policy information about [availability of computer code](#)

|                 |                                                                                                                                                                                                                                                                                                                                                                                                                                                           |
|-----------------|-----------------------------------------------------------------------------------------------------------------------------------------------------------------------------------------------------------------------------------------------------------------------------------------------------------------------------------------------------------------------------------------------------------------------------------------------------------|
| Data collection | BAT-12 microprobe thermometer (Physitemp)<br>OneTouch UltraVue automatic glucometers (Johnson & Johnson)<br>Zeiss Axio Scan7 slide scanner (ZEISS)<br>Oxymax/CLAMS metabolic cage system (Columbus Instruments), Metascreen software (version 2.2.15.12)<br>Orbitrap Astral (Thermo Fisher)<br>Zeiss LSM980+ Airyscan2 (ZEISS)<br>Epson Scan software (version 3.9.3.4)<br>Peaks Studio Xpro software (version 10.6)<br>Proteome Discoverer (version 2.2) |
| Data analysis   | Prism 8.0 (GraphPad software, version 8)<br>Image J software (version 1.8.0 National Institute of Health Freeware)<br>ZEISS ZEN 3.8 (Zeiss software, version 3.8.99.01000)<br>VENNY 2.1 website ( <a href="https://bioinfogp.cnb.csic.es/tools/venny/">https://bioinfogp.cnb.csic.es/tools/venny/</a> )<br>Adobe Illustrator 2025 (version 29.1)                                                                                                          |

For manuscripts utilizing custom algorithms or software that are central to the research but not yet described in published literature, software must be made available to editors and reviewers. We strongly encourage code deposition in a community repository (e.g. GitHub). See the Nature Portfolio [guidelines for submitting code & software](#) for further information.

## Data

Policy information about [availability of data](#)

All manuscripts must include a [data availability statement](#). This statement should provide the following information, where applicable:

- Accession codes, unique identifiers, or web links for publicly available datasets
- A description of any restrictions on data availability
- For clinical datasets or third party data, please ensure that the statement adheres to our [policy](#)

All the cell lines, plasmids and mouse model generated in this study will be made available on request, but we may require a payment or a completed materials transfer agreement if there is potential for commercial application.

All the mass spectrometry proteomics data in this study have been deposited to the ProteomeXchange Consortium (<https://proteomecentral.proteomexchange.org>) via the iProX partner repository with the dataset identifier PXD072406, PXD072318 and PXD072319.

Original western blot images and statistics source data can be found in Extended data, and are publicly available as of the date of publication.

Microscopy data reported in this paper will be shared by the lead contact upon request

## Research involving human participants, their data, or biological material

Policy information about studies with [human participants or human data](#). See also policy information about [sex, gender \(identity/presentation\), and sexual orientation](#) and [race, ethnicity and racism](#).

|                                                                    |     |
|--------------------------------------------------------------------|-----|
| Reporting on sex and gender                                        | N/A |
| Reporting on race, ethnicity, or other socially relevant groupings | N/A |
| Population characteristics                                         | N/A |
| Recruitment                                                        | N/A |
| Ethics oversight                                                   | N/A |

Note that full information on the approval of the study protocol must also be provided in the manuscript.

## Field-specific reporting

Please select the one below that is the best fit for your research. If you are not sure, read the appropriate sections before making your selection.

Life sciences       Behavioural & social sciences       Ecological, evolutionary & environmental sciences

For a reference copy of the document with all sections, see [nature.com/documents/nr-reporting-summary-flat.pdf](https://nature.com/documents/nr-reporting-summary-flat.pdf)

## Life sciences study design

All studies must disclose on these points even when the disclosure is negative.

|                 |                                                                                                                                                                                                                                                                                                                                                                                                                                                                                                                                                                                   |
|-----------------|-----------------------------------------------------------------------------------------------------------------------------------------------------------------------------------------------------------------------------------------------------------------------------------------------------------------------------------------------------------------------------------------------------------------------------------------------------------------------------------------------------------------------------------------------------------------------------------|
| Sample size     | No statistical methods were used to pre-determine sample sizes, but our sample sizes are similar to those reported in previous publications. N=3 mice were used to perform unbiased quantitative phosphoproteomic analysis; n=5 mice were used to evaluate the cold tolerance, oxygen consumption and other metabolic test; n=6 mice were used to evaluate the BAT lipolysis activity. Measurements for all cell-based assays were based on 3 to 5 technical replicates (wells) within a single experiment.                                                                       |
| Data exclusions | No data were excluded.                                                                                                                                                                                                                                                                                                                                                                                                                                                                                                                                                            |
| Replication     | All experimental findings were repeated at least three times, as stated in figure legends, and all additional replication attempts were successful.                                                                                                                                                                                                                                                                                                                                                                                                                               |
| Randomization   | Randomization was applied wherever possible. For mice experiment, wild-type mice used in quantitative phosphoproteomic analysis and <i>Kat5<sup>flax/flax</sup></i> used for AAV injection were randomly divided into two groups. For cell experiments, cells were seeded in parallel and randomly assigned to different treatments.<br>Otherwise, randomization was not performed. Mice were assigned to groups according to genotype (wild-type as control, knockout as experimental) in a non-randomized design. Other experimental procedures were randomized where possible. |
| Blinding        | Blinding was applied wherever possible. For example, samples, cages or vials during sample collection and processing were labelled as code names by the individual who picked and treated animals or cells but did not participate in processing and experimental determinations, and the samples were revealed after completion of the experiment. Similarly, during microscopy data collection and statistical analyses, the fields                                                                                                                                             |

of view were chosen on a random basis, and are often performed by different operators, preventing potentially biased selection for desired phenotypes.

## Behavioural & social sciences study design

All studies must disclose on these points even when the disclosure is negative.

|                   |                                  |
|-------------------|----------------------------------|
| Study description | <input type="text" value="N/A"/> |
| Research sample   | <input type="text" value="N/A"/> |
| Sampling strategy | <input type="text" value="N/A"/> |
| Data collection   | <input type="text" value="N/A"/> |
| Timing            | <input type="text" value="N/A"/> |
| Data exclusions   | <input type="text" value="N/A"/> |
| Non-participation | <input type="text" value="N/A"/> |
| Randomization     | <input type="text" value="N/A"/> |

## Ecological, evolutionary & environmental sciences study design

All studies must disclose on these points even when the disclosure is negative.

|                          |                                  |
|--------------------------|----------------------------------|
| Study description        | <input type="text" value="N/A"/> |
| Research sample          | <input type="text" value="N/A"/> |
| Sampling strategy        | <input type="text" value="N/A"/> |
| Data collection          | <input type="text" value="N/A"/> |
| Timing and spatial scale | <input type="text" value="N/A"/> |
| Data exclusions          | <input type="text" value="N/A"/> |
| Reproducibility          | <input type="text" value="N/A"/> |
| Randomization            | <input type="text" value="N/A"/> |
| Blinding                 | <input type="text" value="N/A"/> |

Did the study involve field work?  Yes  No

## Reporting for specific materials, systems and methods

We require information from authors about some types of materials, experimental systems and methods used in many studies. Here, indicate whether each material, system or method listed is relevant to your study. If you are not sure if a list item applies to your research, read the appropriate section before selecting a response.

### Materials & experimental systems

### Methods

|                                     |                                                                 |
|-------------------------------------|-----------------------------------------------------------------|
| n/a                                 | Involves in the study                                           |
| <input type="checkbox"/>            | <input checked="" type="checkbox"/> Antibodies                  |
| <input type="checkbox"/>            | <input checked="" type="checkbox"/> Eukaryotic cell lines       |
| <input checked="" type="checkbox"/> | <input type="checkbox"/> Palaeontology and archaeology          |
| <input type="checkbox"/>            | <input checked="" type="checkbox"/> Animals and other organisms |
| <input checked="" type="checkbox"/> | <input type="checkbox"/> Clinical data                          |
| <input checked="" type="checkbox"/> | <input type="checkbox"/> Dual use research of concern           |
| <input checked="" type="checkbox"/> | <input type="checkbox"/> Plants                                 |

|                                     |                                                 |
|-------------------------------------|-------------------------------------------------|
| n/a                                 | Involves in the study                           |
| <input checked="" type="checkbox"/> | <input type="checkbox"/> ChIP-seq               |
| <input checked="" type="checkbox"/> | <input type="checkbox"/> Flow cytometry         |
| <input checked="" type="checkbox"/> | <input type="checkbox"/> MRI-based neuroimaging |

## Antibodies used

The following antibodies were purchased from Cell Signaling Technology.  
 rabbit UCP1 Polyclonal antibody (cat. 72298S, 1:1,000 for IB)  
 CREB Rabbit Monoclonal Antibody (cat. 9197T, 1:1,000 for IB)  
 GSK-3 alpha Rabbit Monoclonal Antibody (cat. 4337S, 1:1,000 for IB)  
 GSK-3 beta Rabbit Monoclonal Antibody (cat. 9043, 1:1,000 for IB)  
 Phospho-GSK-3 beta (Ser9) Rabbit Monoclonal Antibody (cat. 9323S, 1:1,000 for IB)  
 HSL Antibody (cat. 4107S, 1:1,000 for IB)  
 Phospho-HSL (Ser563) Antibody (cat. 4139S, 1:1,000 for IB)  
 Phospho-HSL (Ser660) Antibody (cat. 45804S, 1:1,000 for IB)  
 Perilipin-1 Rabbit Monoclonal Antibody (cat. 9349S, 1:1,000 for IB)  
 Mouse Anti-rabbit IgG (Conformation Specific) Monoclonal Antibody (cat. 5127S, 1:2,000 for IB)  
 Rabbit Monoclonal Antibody IgG Isotype Control (cat. 3900S)

The following antibodies were purchased from Proteintech.  
 TIP60/KAT5 Polyclonal antibody (cat. 10827-1-AP, 1:1,000 for IB)  
 Beta Actin antibody (cat. 66009-1-Ig, 1:5,000 for IB)  
 PRKACA Polyclonal antibody (cat. 27398-1-AP, 1:1,000 for IB)  
 Phospho-CREB1 (Ser133) Polyclonal antibody (cat. 28792-1-AP, 1:1,000 for IB)  
 MYC-tag antibody (cat. 16286-1-Ig, 1:1,000 for IB)  
 HA-tag antibody (cat. 51064-2-AP, 1:1,000 for IB)  
 HSL Polyclonal antibody (cat. 17333-1-AP, 1:200 for IF)

The following antibodies were purchased from Thermo Fisher Scientific.  
 Goat anti-Rabbit IgG (H+L) Cross-Adsorbed Secondary Antibody, Alexa Fluor™ 594 (cat. A-11012, 1:1,000 for IF)  
 Goat anti-Mouse IgG (H+L) Secondary Antibody (cat. 31430, 1:5,000 for IB)  
 Goat anti-Rabbit IgG (H+L) Secondary Antibody (cat. 31460, 1:5,000 for IB)

Rabbit anti-Ack577-HSL (1:1,000 for IB) was generated by our laboratory. KAT5 / Tip60 (phospho S86) antibody (cat. Ab73207, 1:1,000 for IB) was purchased from Abcam. HA-tag antibody (cat. Sc-7392, 1:100 for IP) was purchased from Santa Cruz Biotechnology. Anti-Acetyllsine Rabbit mAb (cat. PTM105RM, 1:1,000 for IB) was purchased from PTM Bio. ANTI-FLAG(R) antibody produced in rabbit was purchased from Sigma-Aldrich (cat. F7425, 1:1,000 for IB).

## Validation

The following commercially available antibodies were validated by the company, as well as other researchers (as the information collected by the RRID database).

Rabbit UCP1 Polyclonal antibody (cat. 72298S, 1:1,000 for IB), RRID: AB\_2936479  
 CREB Rabbit Monoclonal Antibody (cat. 9197T, 1:1,000 for IB), RRID: AB\_331277  
 GSK-3 alpha Rabbit Monoclonal Antibody (cat. 4337S, 1:1,000 for IB), RRID: AB\_10859910. (validated in Fig. 2h)  
 GSK-3 beta Rabbit Monoclonal Antibody (cat. 9043, 1:1,000 for IB), RRID: AB\_2636978. (validated in Fig. 2h)  
 Phospho-GSK-3 beta (Ser9) Rabbit Monoclonal Antibody (cat. 9323S, 1:1,000 for IB), RRID: AB\_2115201  
 HSL Antibody (cat. 4107S, 1:1,000 for IB), RRID: AB\_2296900. (validated in Fig. 6d)  
 Phospho-HSL (Ser563) Antibody (cat. 4139S, 1:1,000 for IB), RRID: AB\_2135495  
 Phospho-HSL (Ser660) Antibody (cat. 45804S, 1:1,000 for IB), RRID: AB\_2893315  
 Perilipin-1 Rabbit Monoclonal Antibody (cat. 9349S, 1:1,000 for IB), RRID: AB\_10829911  
 Mouse Anti-rabbit IgG (Conformation Specific) Monoclonal Antibody (cat. 5127S, 1:2,000 for IB), RRID: AB\_10892860  
 Rabbit Monoclonal Antibody IgG Isotype Control (cat. 3900S), RRID: AB\_1550038  
 TIP60/KAT5 Polyclonal antibody (cat. 10827-1-AP, 1:1,000 for IB), RRID: AB\_2128431. (validated in Fig. 1d)  
 Beta Actin antibody (cat. 66009-1-Ig, 1:5,000 for IB), RRID: AB\_2687938  
 PRKACA Polyclonal antibody (cat. 27398-1-AP, 1:1,000 for IB), RRID: AB\_2880861. (validated in Fig. 2e)  
 Phospho-CREB1 (Ser133) Polyclonal antibody (cat. 28792-1-AP, 1:1,000 for IB), RRID: AB\_2918203  
 MYC-tag antibody (cat. 16286-1-Ig, 1:1,000 for IB), RRID: AB\_11182162. (validated in Extend data Fig. 4b)  
 HA-tag antibody (cat. 51064-2-AP, 1:1,000 for IB), RRID: AB\_11042321. (validated in Fig. 4c)  
 HSL Polyclonal antibody (cat. 17333-1-AP, 1:200 for IF), RRID: AB\_2878386.  
 Goat anti-Rabbit IgG (H+L) Cross-Adsorbed Secondary Antibody, Alexa Fluor™ 594 (cat. A-11012, 1:1,000 for IF), RRID: AB\_2534079  
 Goat anti-Mouse IgG (H+L) Secondary Antibody (cat. 31430, 1:5,000 for IB), RRID: AB\_228307  
 Goat anti-Rabbit IgG (H+L) Secondary Antibody (cat. 31460, 1:5,000 for IB), RRID: AB\_228341  
 KAT5 / Tip60 (phospho S86) antibody (cat. Ab73207, 1:1,000 for IB), RRID: AB\_1523845. (validated in Fig. 4b)  
 HA-tag antibody (cat. Sc-7392, 1:100 for IP), RRID: AB\_627809.  
 Anti-Acetyllsine Rabbit mAb (cat. PTM105RM, 1:1,000 for IB), RRID: AB\_3099509. (validated in Fig. 4c)  
 ANTI-FLAG(R) antibody (cat. F7425, 1:1,000 for IB), RRID: AB\_439687. (validated in Fig. 4c)

Rabbit anti-Ack577-HSL was validated in Fig. 3I.

## Eukaryotic cell lines

Policy information about [cell lines and Sex and Gender in Research](#)

|                                                                   |                                                                                                                                                                                                                                                                                                                                                                                                                                                                                                                                                                  |
|-------------------------------------------------------------------|------------------------------------------------------------------------------------------------------------------------------------------------------------------------------------------------------------------------------------------------------------------------------------------------------------------------------------------------------------------------------------------------------------------------------------------------------------------------------------------------------------------------------------------------------------------|
| Cell line source(s)                                               | SVF cells were isolated from the interscapular BAT of <i>Kat5<sup>fllox/fllox</sup></i> mice (including both male and female mice) as described previously (Ref 35, 36).<br>HEK293T cells (cat. CRL-3216) cells were purchased from ATCC. Mouse BAC cells were provided by Professor Junli Liu from Shanghai Jiao Tong University Affiliated Sixth People's Hospital (Shanghai, China).<br><i>Kat5</i> knockout BAC cells, <i>Hsl</i> knockout BAC cells, <i>Prkaca</i> knockout BAC cells and <i>Plin1</i> knockout BAC cells were generated by our laboratory. |
| Authentication                                                    | HEK293T cells and BAC cells were authenticated by STR sequencing performed by ImmoCell Biotechnology Corporation (Xiamen, China).                                                                                                                                                                                                                                                                                                                                                                                                                                |
| Mycoplasma contamination                                          | The cell lines were routinely tested negative for mycoplasma contamination in our laboratory.                                                                                                                                                                                                                                                                                                                                                                                                                                                                    |
| Commonly misidentified lines (See <a href="#">ICLAC</a> register) | No commonly misidentified lines were used.                                                                                                                                                                                                                                                                                                                                                                                                                                                                                                                       |

## Palaeontology and Archaeology

|                                                                                                                                                 |     |
|-------------------------------------------------------------------------------------------------------------------------------------------------|-----|
| Specimen provenance                                                                                                                             | N/A |
| Specimen deposition                                                                                                                             | N/A |
| Dating methods                                                                                                                                  | N/A |
| <input type="checkbox"/> Tick this box to confirm that the raw and calibrated dates are available in the paper or in Supplementary Information. |     |
| Ethics oversight                                                                                                                                | N/A |

Note that full information on the approval of the study protocol must also be provided in the manuscript.

## Animals and other research organisms

Policy information about [studies involving animals](#); [ARRIVE guidelines](#) recommended for reporting animal research, and [Sex and Gender in Research](#)

|                         |                                                                                                                                                                                                                                                                                                                                                                                                                                                                                                                                                                                                                               |
|-------------------------|-------------------------------------------------------------------------------------------------------------------------------------------------------------------------------------------------------------------------------------------------------------------------------------------------------------------------------------------------------------------------------------------------------------------------------------------------------------------------------------------------------------------------------------------------------------------------------------------------------------------------------|
| Laboratory animals      | Male C57BL/6J mice (8 weeks old) were obtained from the Xiamen University Laboratory Animal Center.<br><i>Kat5<sup>fllox/fllox</sup></i> mice were generously provided by Professor Jianfeng Wu from Xiamen University.<br><i>Ucp1-Cre</i> mice were acquired from the Jackson Laboratory (Cat 024670; RRID: IMSR_JAX:024670).<br>Mice were housed with free access to water and a standard diet (65% carbohydrate, 11% fat, 24% protein; cat. XT101WC-010, Xietong biology) under specific pathogen-free (SPF) conditions. The light was on from 7:00 to 19:00, with the temperature kept at 20–23°C and humidity at 40–70%. |
| Wild animals            | The study did not involve wild animals.                                                                                                                                                                                                                                                                                                                                                                                                                                                                                                                                                                                       |
| Reporting on sex        | Both male and female animals were used in this study.                                                                                                                                                                                                                                                                                                                                                                                                                                                                                                                                                                         |
| Field-collected samples | The study did not involve samples collected from the field.                                                                                                                                                                                                                                                                                                                                                                                                                                                                                                                                                                   |
| Ethics oversight        | Protocols for all animal experiments were approved by the Institutional Animal Care and the Animal Committee of Xiamen University (XMULAC20220050).                                                                                                                                                                                                                                                                                                                                                                                                                                                                           |

Note that full information on the approval of the study protocol must also be provided in the manuscript.

## Clinical data

Policy information about [clinical studies](#)

All manuscripts should comply with the ICMJE [guidelines for publication of clinical research](#) and a completed [CONSORT checklist](#) must be included with all submissions.

|                             |                                  |
|-----------------------------|----------------------------------|
| Clinical trial registration | <input type="text" value="N/A"/> |
| Study protocol              | <input type="text" value="N/A"/> |
| Data collection             | <input type="text" value="N/A"/> |
| Outcomes                    | <input type="text" value="N/A"/> |

## Dual use research of concern

Policy information about [dual use research of concern](#)

### Hazards

Could the accidental, deliberate or reckless misuse of agents or technologies generated in the work, or the application of information presented in the manuscript, pose a threat to:

| No                                  | Yes                      |                            |
|-------------------------------------|--------------------------|----------------------------|
| <input checked="" type="checkbox"/> | <input type="checkbox"/> | Public health              |
| <input checked="" type="checkbox"/> | <input type="checkbox"/> | National security          |
| <input checked="" type="checkbox"/> | <input type="checkbox"/> | Crops and/or livestock     |
| <input checked="" type="checkbox"/> | <input type="checkbox"/> | Ecosystems                 |
| <input checked="" type="checkbox"/> | <input type="checkbox"/> | Any other significant area |

### Experiments of concern

Does the work involve any of these experiments of concern:

| No                                  | Yes                      |                                                                             |
|-------------------------------------|--------------------------|-----------------------------------------------------------------------------|
| <input checked="" type="checkbox"/> | <input type="checkbox"/> | Demonstrate how to render a vaccine ineffective                             |
| <input checked="" type="checkbox"/> | <input type="checkbox"/> | Confer resistance to therapeutically useful antibiotics or antiviral agents |
| <input checked="" type="checkbox"/> | <input type="checkbox"/> | Enhance the virulence of a pathogen or render a nonpathogen virulent        |
| <input checked="" type="checkbox"/> | <input type="checkbox"/> | Increase transmissibility of a pathogen                                     |
| <input checked="" type="checkbox"/> | <input type="checkbox"/> | Alter the host range of a pathogen                                          |
| <input checked="" type="checkbox"/> | <input type="checkbox"/> | Enable evasion of diagnostic/detection modalities                           |
| <input checked="" type="checkbox"/> | <input type="checkbox"/> | Enable the weaponization of a biological agent or toxin                     |
| <input checked="" type="checkbox"/> | <input type="checkbox"/> | Any other potentially harmful combination of experiments and agents         |

## Plants

|                       |                                  |
|-----------------------|----------------------------------|
| Seed stocks           | <input type="text" value="N/A"/> |
| Novel plant genotypes | <input type="text" value="N/A"/> |
| Authentication        | <input type="text" value="N/A"/> |

## ChIP-seq

### Data deposition

- Confirm that both raw and final processed data have been deposited in a public database such as [GEO](#).
- Confirm that you have deposited or provided access to graph files (e.g. BED files) for the called peaks.

Data access links

*May remain private before publication.*

N/A

Files in database submission

N/A

Genome browser session

(e.g. [UCSC](#))

N/A

### Methodology

Replicates

N/A

Sequencing depth

N/A

Antibodies

N/A

Peak calling parameters

N/A

Data quality

N/A

Software

N/A

## Flow Cytometry

### Plots

Confirm that:

- The axis labels state the marker and fluorochrome used (e.g. CD4-FITC).
- The axis scales are clearly visible. Include numbers along axes only for bottom left plot of group (a 'group' is an analysis of identical markers).
- All plots are contour plots with outliers or pseudocolor plots.
- A numerical value for number of cells or percentage (with statistics) is provided.

### Methodology

Sample preparation

N/A

Instrument

N/A

Software

N/A

Cell population abundance

N/A

Gating strategy

N/A

- Tick this box to confirm that a figure exemplifying the gating strategy is provided in the Supplementary Information.

## Magnetic resonance imaging

### Experimental design

Design type

N/A

Design specifications

N/A

Behavioral performance measures

N/A

## Acquisition

|                               |                                  |                                              |
|-------------------------------|----------------------------------|----------------------------------------------|
| Imaging type(s)               | <input type="text" value="N/A"/> |                                              |
| Field strength                | <input type="text" value="N/A"/> |                                              |
| Sequence & imaging parameters | <input type="text" value="N/A"/> |                                              |
| Area of acquisition           | <input type="text" value="N/A"/> |                                              |
| Diffusion MRI                 | <input type="checkbox"/> Used    | <input checked="" type="checkbox"/> Not used |

## Preprocessing

|                            |                                  |
|----------------------------|----------------------------------|
| Preprocessing software     | <input type="text" value="N/A"/> |
| Normalization              | <input type="text" value="N/A"/> |
| Normalization template     | <input type="text" value="N/A"/> |
| Noise and artifact removal | <input type="text" value="N/A"/> |
| Volume censoring           | <input type="text" value="N/A"/> |

## Statistical modeling & inference

|                                                                           |                                                                                                       |
|---------------------------------------------------------------------------|-------------------------------------------------------------------------------------------------------|
| Model type and settings                                                   | <input type="text" value="N/A"/>                                                                      |
| Effect(s) tested                                                          | <input type="text" value="N/A"/>                                                                      |
| Specify type of analysis:                                                 | <input type="checkbox"/> Whole brain <input type="checkbox"/> ROI-based <input type="checkbox"/> Both |
| Statistic type for inference<br>(See <a href="#">Eklund et al. 2016</a> ) | <input type="text" value="N/A"/>                                                                      |
| Correction                                                                | <input type="text" value="N/A"/>                                                                      |

## Models & analysis

|                                     |                                                                       |
|-------------------------------------|-----------------------------------------------------------------------|
| n/a                                 | Involvement in the study                                              |
| <input checked="" type="checkbox"/> | <input type="checkbox"/> Functional and/or effective connectivity     |
| <input checked="" type="checkbox"/> | <input type="checkbox"/> Graph analysis                               |
| <input checked="" type="checkbox"/> | <input type="checkbox"/> Multivariate modeling or predictive analysis |
